# Supplementary material for: Synthesis of plasmonic Ti3+ doped Au/Cl-TiO2 mesocrystals with enhanced visible light photocatalytic activity
Source: Royal Society of Chemistry journal article supplement (doi:10.1039/c7dt02824e), 2017-01-01
Supplement: c7dt02824e1.pdf [file c7dt02824e1.pdf]

Synthesis of plasmonic  $\text{Ti}^{3+}$  doped  $\text{Au/Cl-TiO}_2$  mesocrystals with enhanced visible-light photocatalytic activity

Xin Yu<sup>a, b, c</sup>, Xiaoli Fan<sup>a, b, c</sup>, Zhonghua Li<sup>\*a, c</sup>, Jiawen Liu<sup>\*d</sup>

<sup>a</sup> Key Laboratory of Microsystems and Microstructures Manufacturing, Ministry of Education, Harbin Institute of Technology, Harbin 150001, P. R. China

<sup>b</sup> School of Chemical Engineering and Technology, Harbin Institute of Technology, Harbin 150001, China

<sup>c</sup> Academy of Fundamental and Interdisciplinary Sciences, Harbin Institute of Technology, Harbin 150001, P. R. China

<sup>d</sup> Key Laboratory for Photochemical Biomaterials and Energy Storage Materials, Heilongjiang Province and College of Chemistry and Chemical Engineering, Harbin Normal University, Harbin 150025, PR China

\* Corresponding author. Tel.: +86 451 86403196; E-mail: [lizh@hit.edu.cn](mailto:lizh@hit.edu.cn) (Z.H. Li); [jiawenliu86@163.com](mailto:jiawenliu86@163.com) (J. Liu).

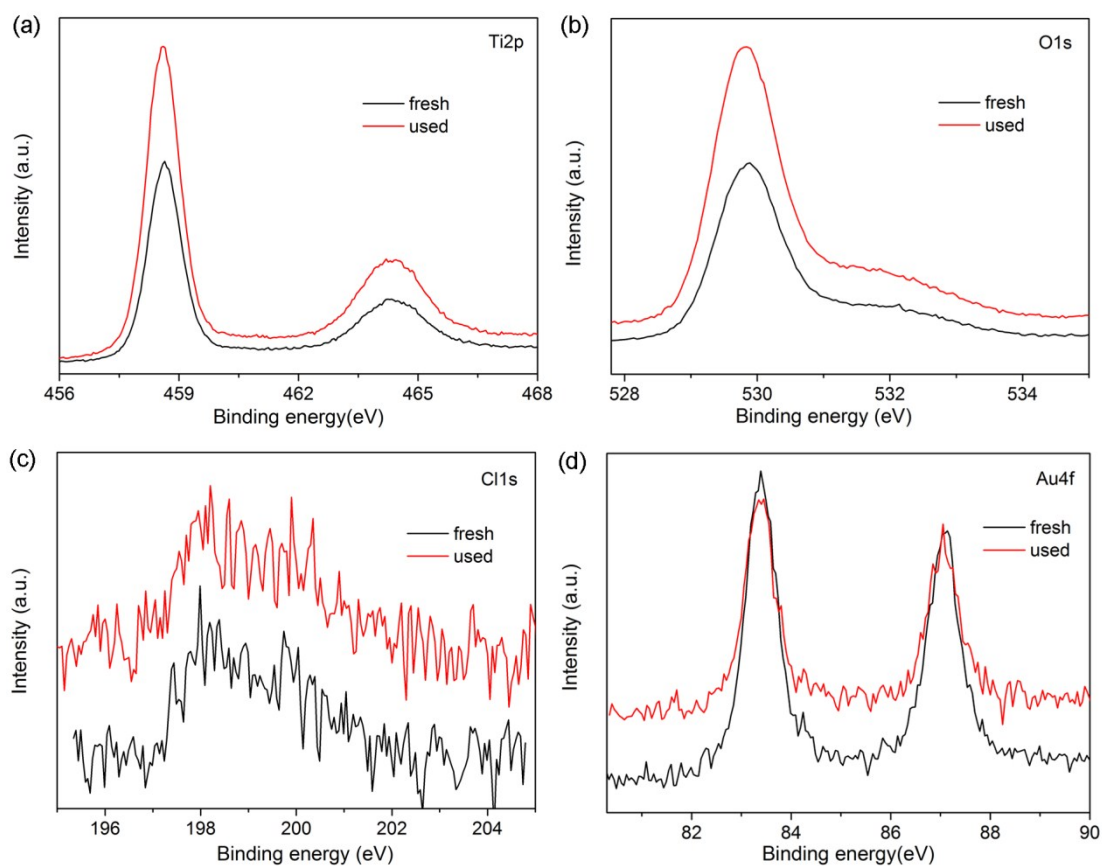

Fig. S1 (a) Ti 2p, (b) O 1s, (c) Cl 1s and (d) Au 4f XPS spectra of the fresh and used  $\text{Ti}^{3+}$  doped  $\text{Au/Cl-TiO}_2$  mesocrystals

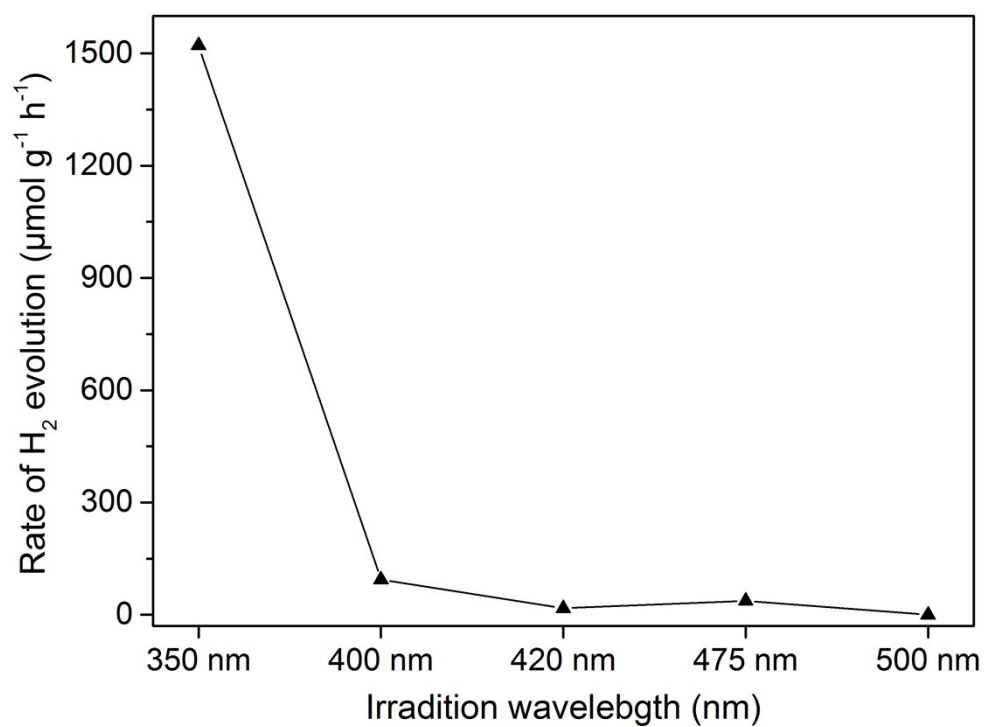

Fig. S2 The wavelength dependent hydrogen production activities of Ti<sup>3+</sup> doped Au/Cl-TiO<sub>2</sub> mesocrystals
